# Supplementary material
Source: MDPI journal article supplement (https://www.mdpi.com/2073-4344/12/6/625)
Supplement: s1 [file s1]

# Supporting Information

## Interface Synergistic Effect from Hierarchically Porous Cu(OH)<sub>2</sub>@FCN MOF/CF Nanosheet Arrays Boosting Electrocatalytic Oxygen Evolution

Xue Li, Yinan Zheng, Hu Yao, Jiayu Bai, Siliang Yue and Xiaohui Guo \*

Key Lab of Synthetic and Natural Functional Molecule Chemistry of Ministry of Education,  
College of Chemistry and Materials Science, Shaanxi Key Laboratory for Carbon Neutral  
Technology, Northwest University, Xi'an 710010, China; lxlxturbo@163.com (X.L.);  
zhengyinan1203@163.com (Y.Z.); 202020797@stumail.nwu.edu.cn (H.Y.);  
bjy2418785398@stumail.nwu.edu.cn (J.B.); yuesiliang98@163.com (S.Y.)

\* Correspondence: guoxh2009@nwu.edu.cn

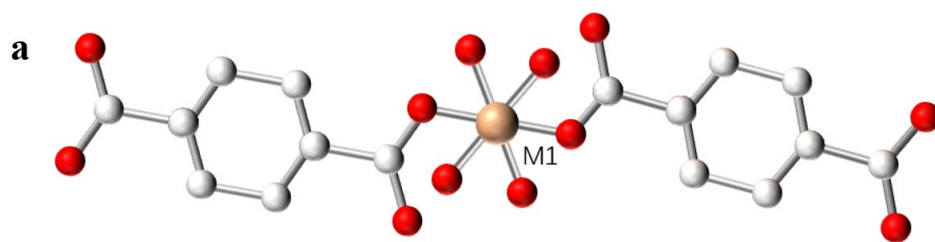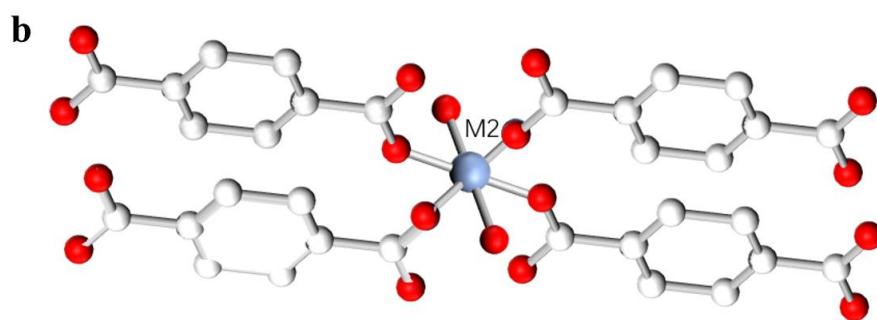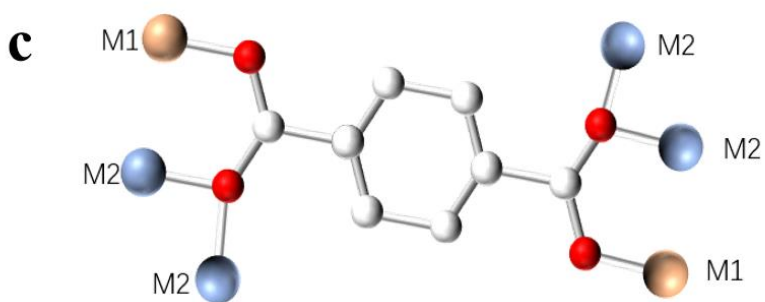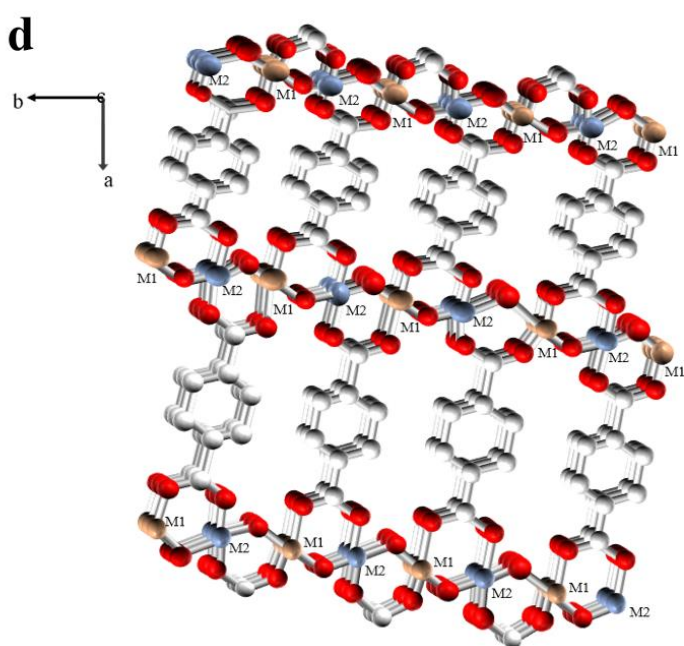

**Figure S1.** The two differently coordinated metal sites (a) M1 and (b) M2 metal ions are both octahedrally coordinated to six O atoms in MOF; (a) M1 metal ion is attached to four  $\mu_3$ -OH and two carboxylate oxygen atoms; (b) The M2 metal ion is linked to two  $\mu_3$ -OH and four carboxylate oxygen atoms; (c) Each BDC organic ligand is coordinated to six metal ions. These  $\text{MO}_6$  (M = M1 or M2) octahedra are bridged along the c-axis by hydrogen-oxygen and further coordinated by hydrogen-oxygen and carboxylate oxygen atoms on the a- and b-axes to form the 3D MOF. Color codes: dark blue and yellow = metal, red = oxygen, silver-white = carbon.

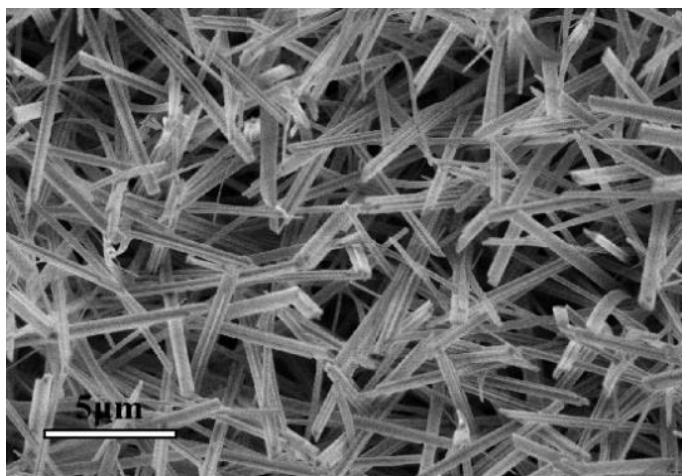

**Figure S2.** SEM image of  $\text{Cu}(\text{OH})_2@\text{CF}$ .

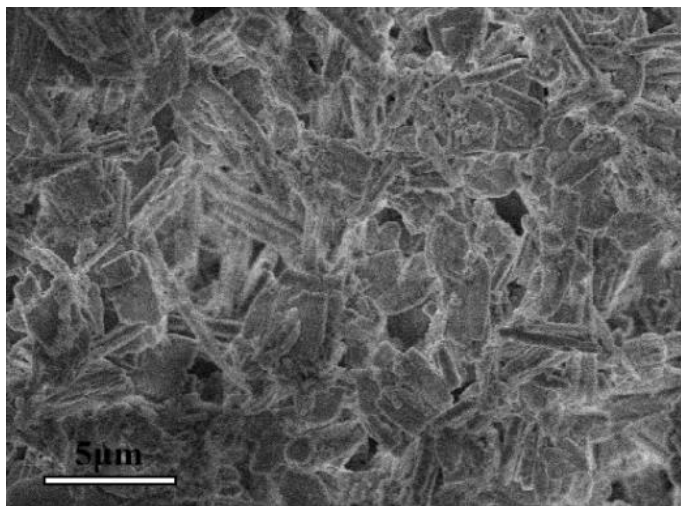

**Figure S3.** SEM image of FCN MOF/CF.

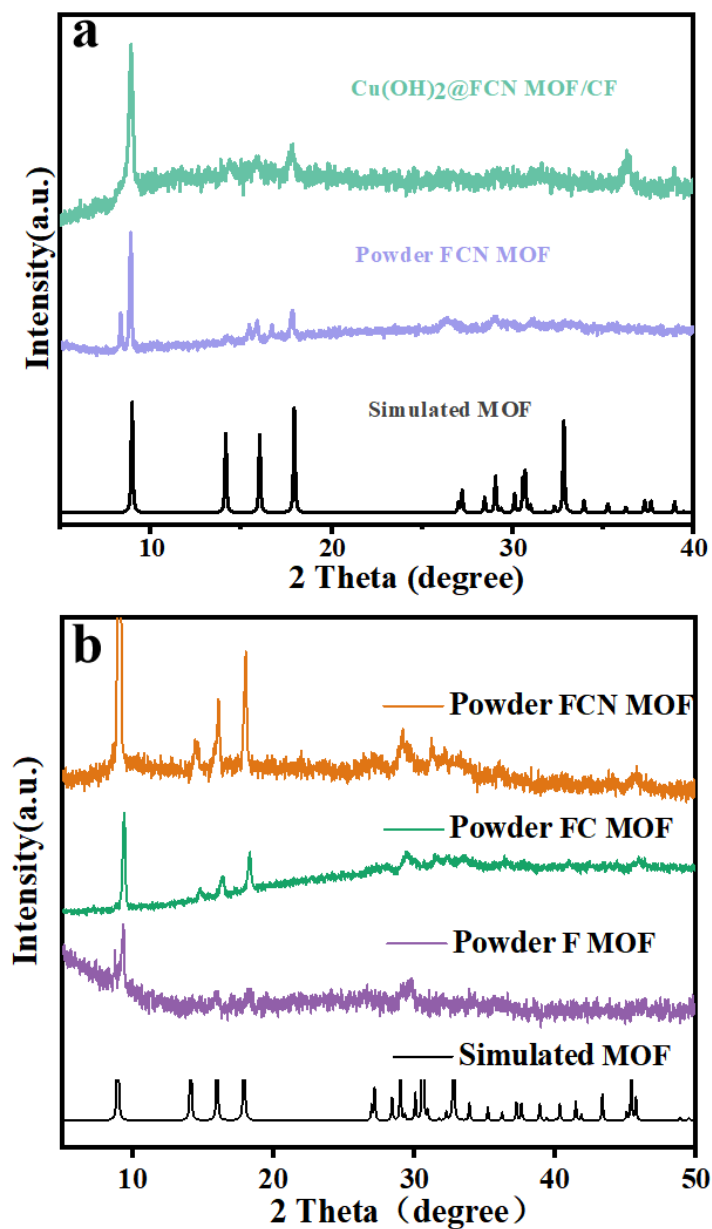

**Figure S4.** (a) Powder XRD patterns of  $\text{Cu}(\text{OH})_2@\text{FCN MOF}/\text{CF}$  and Powder FCNMOF; (b) Powder XRD patterns of FCN-MOF, FC-MOF, F-MOF.

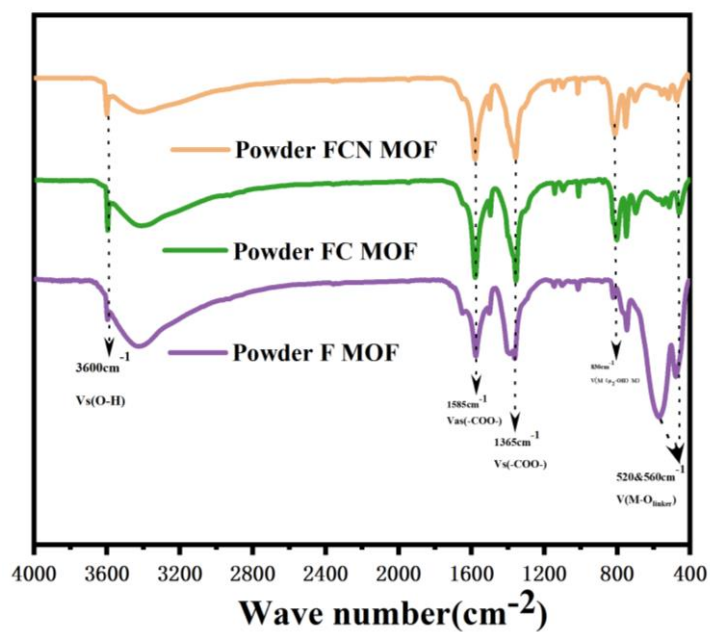

**Figure S5.** FT-IR spectra of FCN-MOF, FC-MOF, and F-MOF.

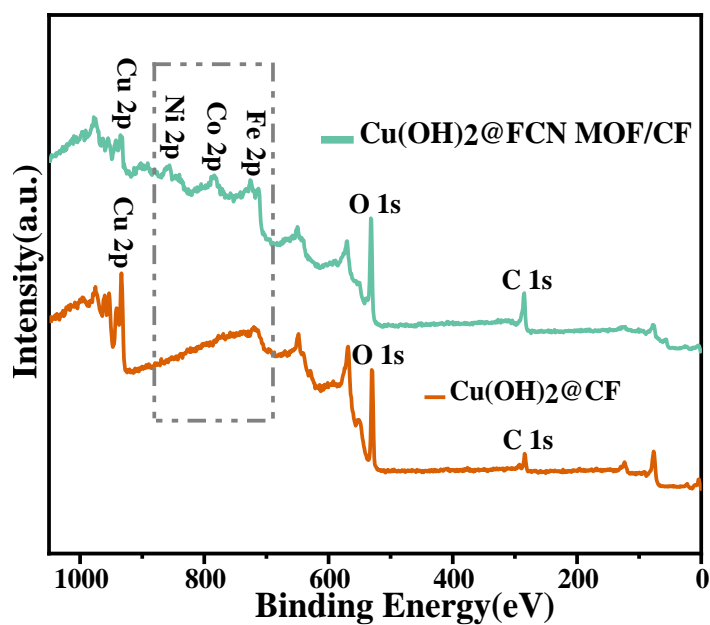

**Figure S6.** The survey XPS spectrum of our synthesized  $\text{Cu(OH)}_2\text{@FCN MOF/CF}$  and  $\text{Cu(OH)}_2\text{@CF}$  samples.

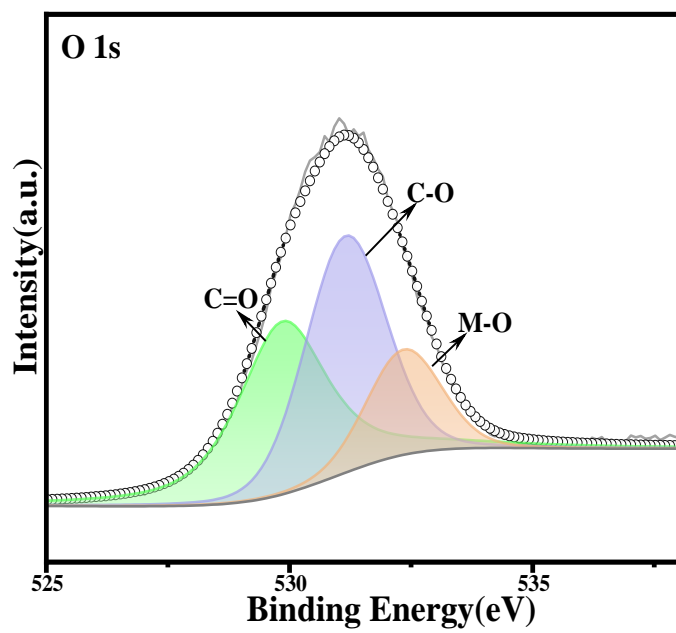

**Figure S7.** High-resolution XPS spectra of O1s of Cu(OH)<sub>2</sub>@FCN MOF/CF.

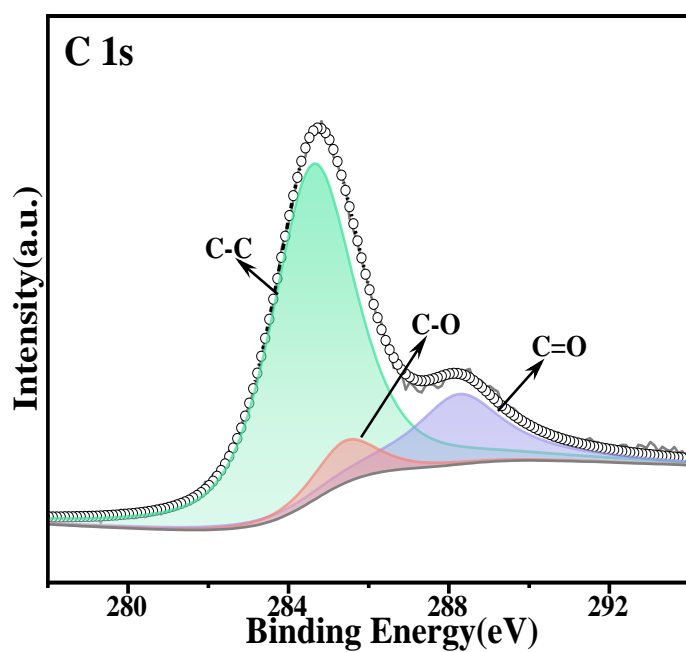

**Figure S8.** High-resolution XPS spectra of C1s of Cu(OH)<sub>2</sub>@FCN MOF/CF.

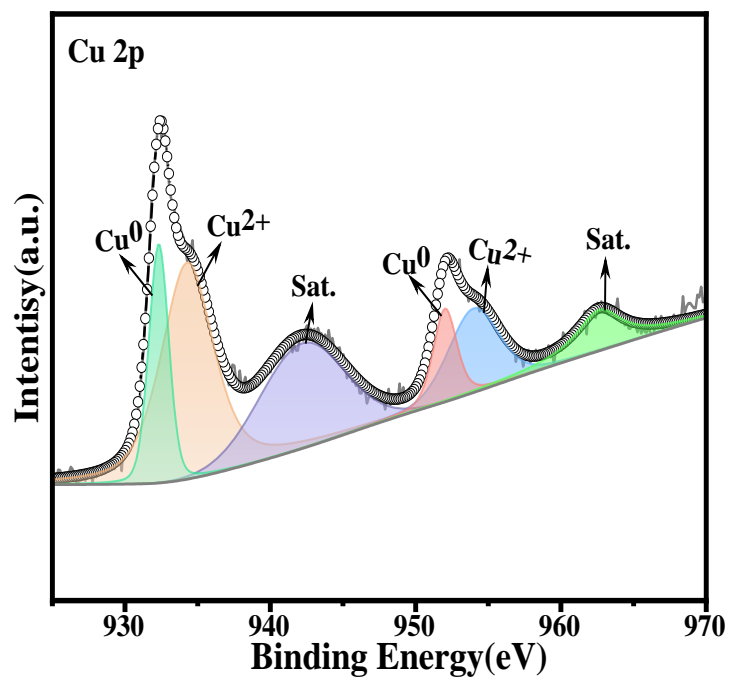

**Figure S9.** High-resolution XPS spectra of Cu 2p of Cu(OH)<sub>2</sub>@FCN MOF/CF.

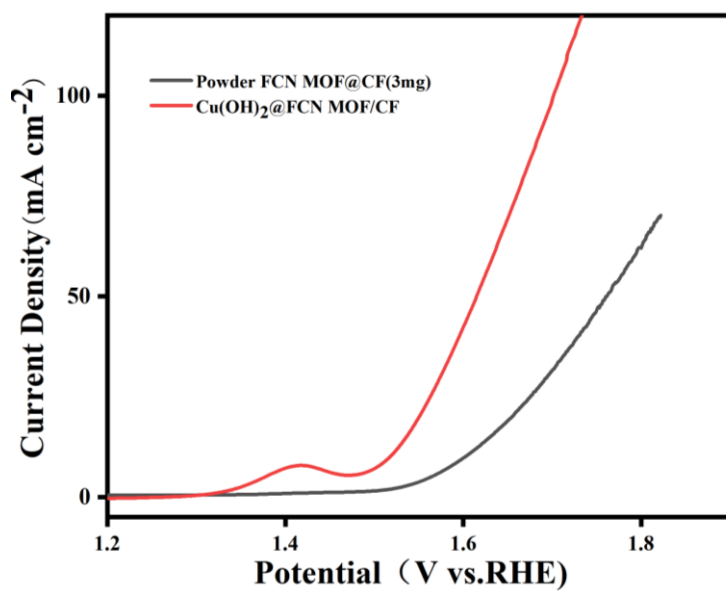

**Figure S10.** LSV curves of Cu(OH)<sub>2</sub>@FCN MOF/CF and Powder FCN MOF@CF.



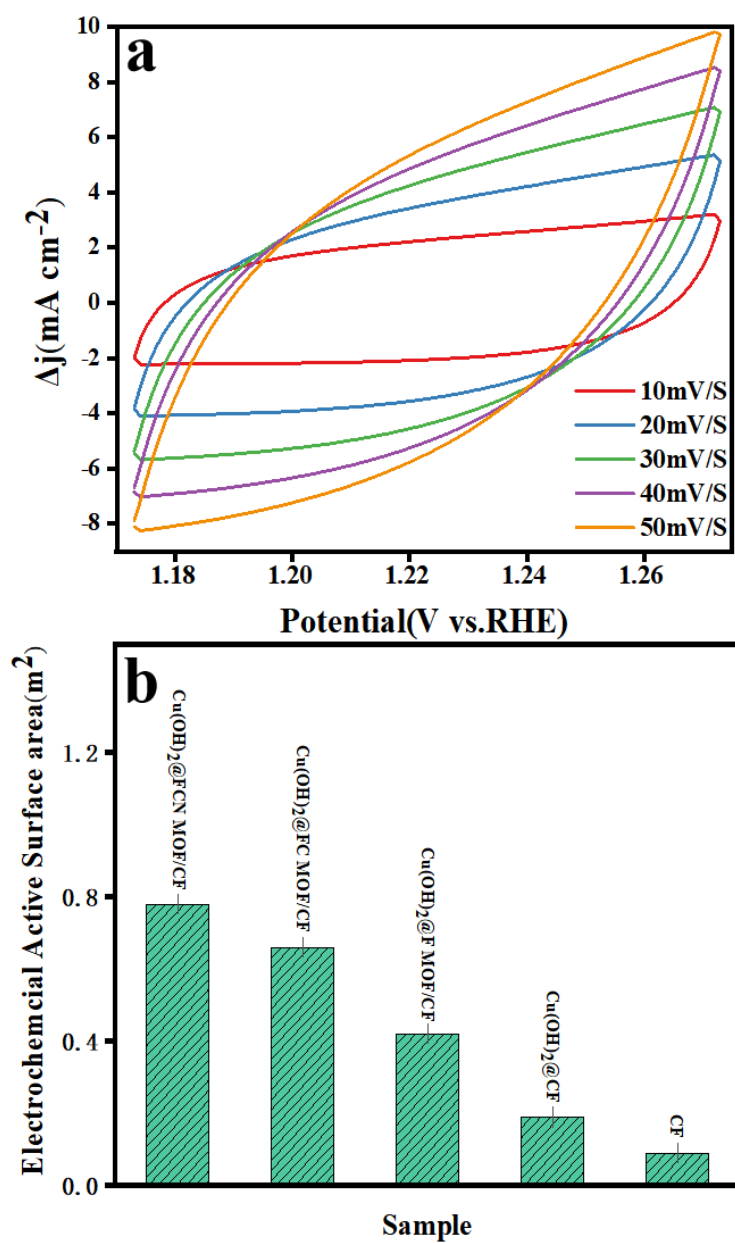

**Figure S11.** (a) CV curves of Cu(OH)<sub>2</sub>@FCN MOF/CF at increasing scan rates (mV/S<sup>-1</sup>); (b) ECSA values of Cu(OH)<sub>2</sub>@MOF/CF catalysts with different metal species.

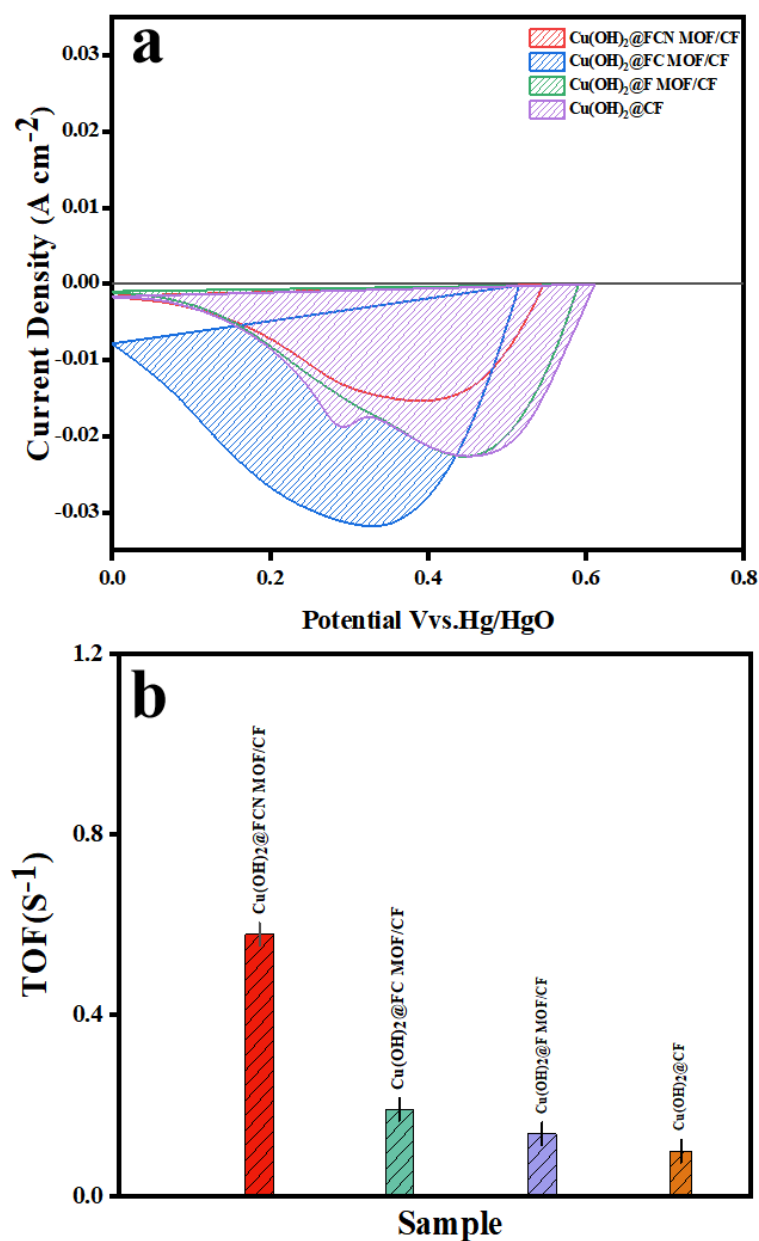

**Figure S12.** (a) Reduction peak acquired for the determination of surface active MOF species; (b) Turnover frequencies (TOF) of  $\text{Cu(OH)}_2\text{@FCN MOF/CF}$ ,  $\text{Cu(OH)}_2\text{@FC MOF/CF}$ ,  $\text{Cu(OH)}_2\text{@F MOF/CF}$  and  $\text{Cu(OH)}_2\text{@CF}$ .

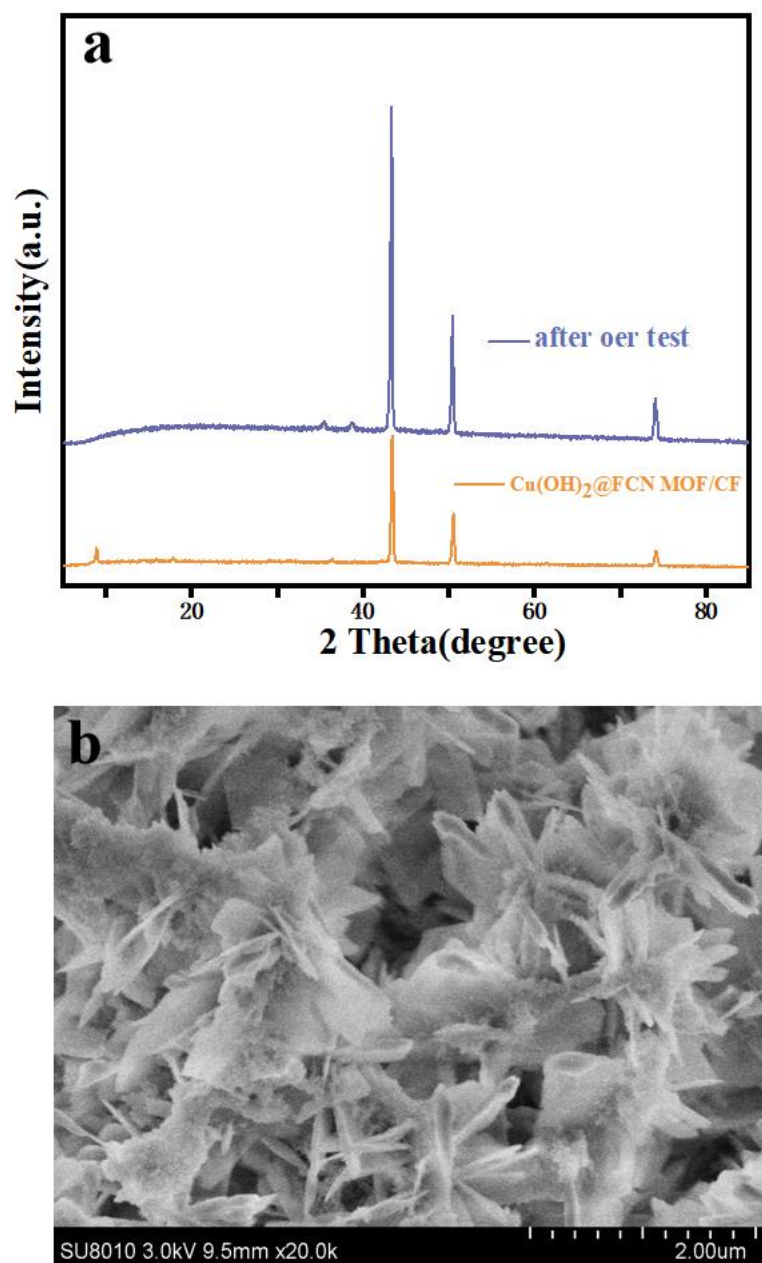

**Figure S13.** (a) Powder XRD patterns before and after OER test; (b) SEM image of Cu(OH)<sub>2</sub>@FCN MOF/CF after OER test .

**Table S1.** Catalyst experimental error results.

| Catalyst                        | Overpotential (10mA/cm <sup>2</sup> )<br>vs.RHE) | C <sub>dl</sub> (mF cm <sup>-2</sup> ) | Tafel slope<br>(mV·dec <sup>-1</sup> ) |
|---------------------------------|--------------------------------------------------|----------------------------------------|----------------------------------------|
| Cu(OH) <sub>2</sub> @FCN MOF/CF | 242.00mV                                         | 315.06±0.017                           | 96.15 ±0.267                           |
| Cu(OH) <sub>2</sub> @FC MOF/CF  | 327.00mV                                         | 265.06±0.009                           | 98.4±0.001                             |
| Cu(OH) <sub>2</sub> @FMOF/CF    | 382.00mV                                         | 171.25±0.002                           | 124.45±0.002                           |
| RuO <sub>2</sub> @CF            | 348.00mV                                         | 201.9±0.001                            | 100.71±0.00007                         |
| Cu(OH) <sub>2</sub> @CF         | 421mV                                            | 78.24±0.001                            | 158.79±0.004                           |
| CF                              | 440mV                                            | 39.31±0.0009                           | 231.57±0.002                           |

**Table S2.** Performance Comparison of Cu(OH)<sub>2</sub>@FCN MOF/CF catalysts and previously reported OER catalysts.

| Catalyst                                              | Electrolyte | Over<br>Potential<br>(10mA/cm <sup>2</sup> )<br>vs.RHE | Tafel slope<br>(mV dec <sup>-1</sup> ) | Reference        |
|-------------------------------------------------------|-------------|--------------------------------------------------------|----------------------------------------|------------------|
| d-PtSe                                                | 1 M KOH     | 310mV                                                  | 129.3                                  | [47]             |
| Co <sub>2</sub> P/CoP@NPGC                            | 1 M KOH     | 340mV                                                  | 116                                    | [48]             |
| Co-CeO <sub>2</sub> /C                                | 1 M KOH     | 380mV                                                  | 99                                     | [49]             |
| Sm-NiMnO <sub>3</sub>                                 | 1 M KOH     | 321mV                                                  | 109                                    | [50]             |
| NiFe <sub>2</sub> O <sub>4</sub> hollow fiber/Ni foam | 1 M KOH     | 433mV                                                  | 134                                    | [51]             |
| Ni <sub>2</sub> P/Mn <sub>2</sub> O <sub>3</sub>      | 1M KOH      | 280mV                                                  | 119.8                                  | [52]             |
| AC-Co <sub>2</sub> (OH) <sub>3</sub> Cl               | 1M KOH      | 272mV                                                  | 151                                    | [53]             |
| CoP/NCNT/PC                                           | 1M KOH      | 282mV                                                  | 103.7                                  | [54]             |
| Sc-CoBDC-3                                            | 1M KOH      | 300mV                                                  | 125                                    | [55]             |
| Cu(OH) <sub>2</sub> @FCNMOF/CF                        | 1M KOH      | 255mV                                                  | <b>96.15</b>                           | <b>This work</b> |

## References:

47. Chang, Y.; Zhai, P.; Hou, J.; Zhao, J.; Gao, J. Excellent HER and OER Catalyzing Performance of Se-Vacancies in Defects-Engineered PtSe<sub>2</sub>: From Simulation to Experiment. *Adv. Energy Mater.* 2022, 12, 2102359.
48. Gong, W.; Zhang, H.; Yang, L.; Yang, Y.; Wang, J.; Liang, H. Core@shell MOFs derived Co<sub>2</sub>P/CoP@NPGC as a highly-active bifunctional electrocatalyst for ORR/OER. *J. Ind. Eng. Chem.* 2022, 106, 492-502.
49. Liu, Z.; Wan, J.; Li, M.; Shi, Z.; Liu, J.; Tang, Y. Synthesis of Co/CeO<sub>2</sub> hetero-particles with abundant oxygen-vacancies supported by carbon aerogels for ORR and OER. *Nanoscale* 2022, 14, 1997-2003.
50. Silva, V. D.; Ferreira, L. S.; Simões, T. A.; Medeiros, E. S.; Macedo, D. A. 1D hollow MFe<sub>2</sub>O<sub>4</sub> (M= Cu, Co, Ni) fibers by Solution Blow Spinning for oxygen evolution reaction. *J. Colloid Interface Sci.* 2019, 540, 59-65.
51. Swathi, S.; Yuvakkumar, R.; Ravi, G.; AlSehemibc, Abdullah G.; Velauthapillai, Dhayalan. Rare earth metal (Sm)-doped NiMnO<sub>3</sub> nanostructures for highly competent alkaline oxygen evolution reaction. *Nanscale adv.* 2022, 4, 2235-2358.
52. Yang, B.; Chang, X.; Ding, X.; Ma, X.; Zhang, M. One-dimensional Ni<sub>2</sub>P/Mn<sub>2</sub>O<sub>3</sub> nanostructures with enhanced oxygen evolution reaction activity. *J. Colloid Interf. Sci.* 2022, 625, 196-204.
53. Jiang, H.; He, Q.; Li, X.; Su, X.; Zhang, Y.; Chen, S.; Zhang, S.M.; Zhang, G.; Jiang, J.; Luo, Y.; Ajayan, P. M.; Song, L. Tracking Structural Self-Reconstruction and Identifying True Active Sites toward Cobalt Oxychloride Precatalyst of Oxygen Evolution Reaction. *Adv. Mater.* 2019, 31, 1805127.

54. Guo, Y.; Sun, Q.; Huang, Q.; Hu, Y.; Su, K.; Li, T. T.; Qian, J. Variable HOF-derived carbon-coated cobalt phosphide for electrocatalytic oxygen evolution. *Carbon*, 2022, 196, 457-465.
55. Huang, Q. Q.; Zhang, L. L.; Wu, P.; Zhang, M. C.; Liu, J. L.; Wu, J. S.; Ren, X. M. The morphology, crystal structure and oxygen evolution reaction electrocatalysis performance of scandium-doped MIL-101 (Fe). *J. Solid State Chem.* 2022, 312, 123202.
